# Supplementary material for: 4D physiologically adaptable cardiac patch: A 4-month in vivo study for the treatment of myocardial infarction
Source: PubMed Central journal article supplement — Sci Adv. 2020 Jun 24;6(26):eabb5067. doi: 10.1126/sciadv.abb5067 (PMC7314523; doi:10.1126/sciadv.abb5067), 2020-06-24
Supplement: abb5067_SM.pdf [file abb5067_SM.pdf]

## Supplementary Materials for

### **4D physiologically adaptable cardiac patch: A 4-month in vivo study for the treatment of myocardial infarction**

Haitao Cui, Chengyu Liu, Timothy Esworthy, Yimin Huang, Zu-xi Yu, Xuan Zhou, Hong San, Se-jun Lee, Sung Yun Hann, Manfred Boehm, Muhammad Mohiuddin, John P. Fisher, Lijie Grace Zhang\*

\*Corresponding author. Email: [lgzhang@gwu.edu](mailto:lgzhang@gwu.edu)

Published 24 June 2020, *Sci. Adv.* **6**, eabb5067 (2020)  
DOI: [10.1126/sciadv.abb5067](https://doi.org/10.1126/sciadv.abb5067)

#### **The PDF file includes:**

Figs. S1 to S7  
Table S1  
Legends for movies S1 to S5

#### **Other Supplementary Material for this manuscript includes the following:**

(available at [advances.sciencemag.org/cgi/content/full/6/26/eabb5067/DC1](https://advances.sciencemag.org/cgi/content/full/6/26/eabb5067/DC1))

Movies S1 to S5

### Supplementary Materials:

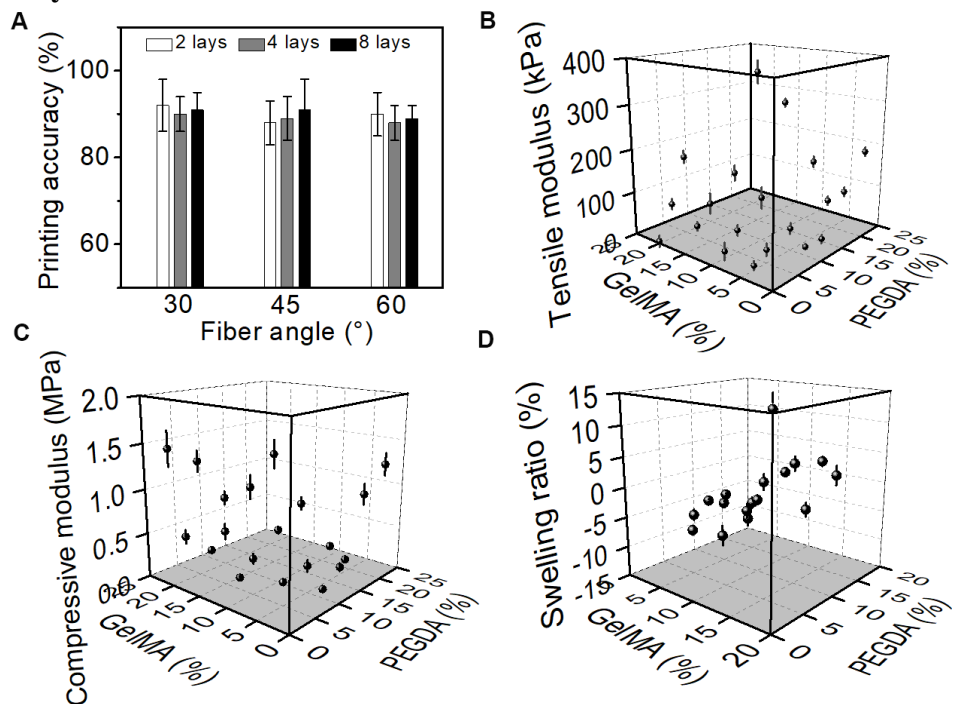

**Fig. S1. Printing accuracy, mechanical modulus, and swelling behaviors of the printed cardiac patches.** (A) Printing accuracy of the hydrogel patches as a function of fiber angle for different layer number; data are presented as the mean  $\pm$  sd.,  $n \geq 6$ . (B) Tensile moduli of the hydrogel patches with varying GelMA and PEGDA concentrations; data are presented as the mean  $\pm$  sd.,  $n \geq 6$ . (C) Compressive moduli of the hydrogel patches with varying GelMA and PEGDA concentrations; data are presented as the mean  $\pm$  sd.,  $n \geq 6$ . (D) Swelling ratio of the hydrogel patches with varying GelMA and PEGDA concentrations; data are presented as the mean  $\pm$  sd.,  $n \geq 6$ .

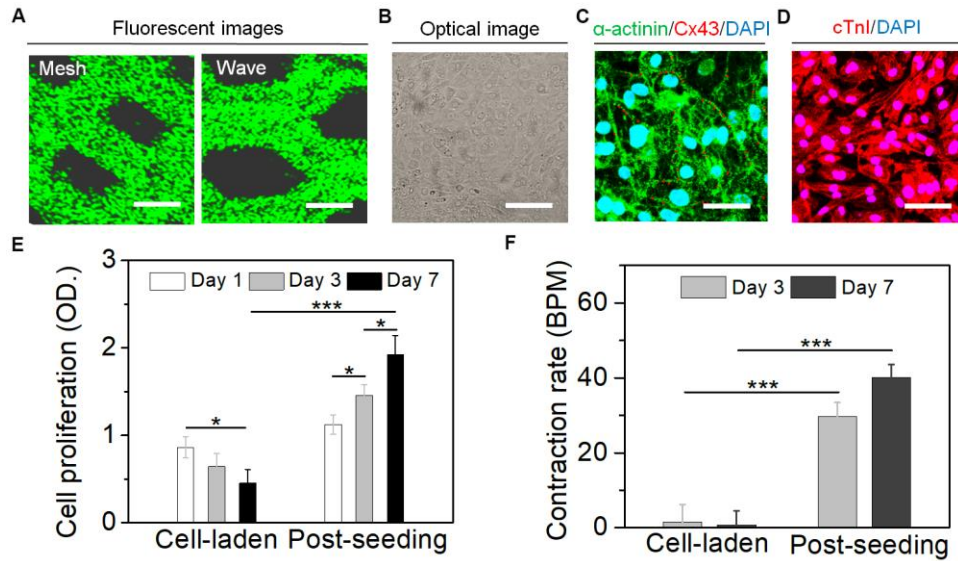

**Fig. S2. Images, cell proliferation, and contraction rate of hiPSC-CMs on the well plate.** (A) Fluorescent images of the mesh-patterned and wave-patterned hydrogel patches. The scale bar is 200  $\mu\text{m}$ . (B) Optical images of monolayer hiPSC-CMs seeded on the well plate. The scale bar is 50  $\mu\text{m}$ . Immunostaining of sarcomeric structure ( $\alpha$ -actinin, green), gap junction (Cx43, red) (C), and contractile Protein (cTnI, red) (D) on the well plate. The scale bar is 30  $\mu\text{m}$ . (E) Cell proliferation of hiPSC-CMs encapsulated in or seeded on the printed patches on day 1, day 3 and day 7; data are presented as the mean  $\pm$  sd.,  $n \geq 9$ , \* $p < 0.05$ , \*\*\* $p < 0.001$ . (F) Beating rate of hiPSC-CMs on the printed patch and well plate on day 3 and day 7; data are presented as the mean  $\pm$  sd.,  $n \geq 6$ , \*\*\* $p < 0.001$ .

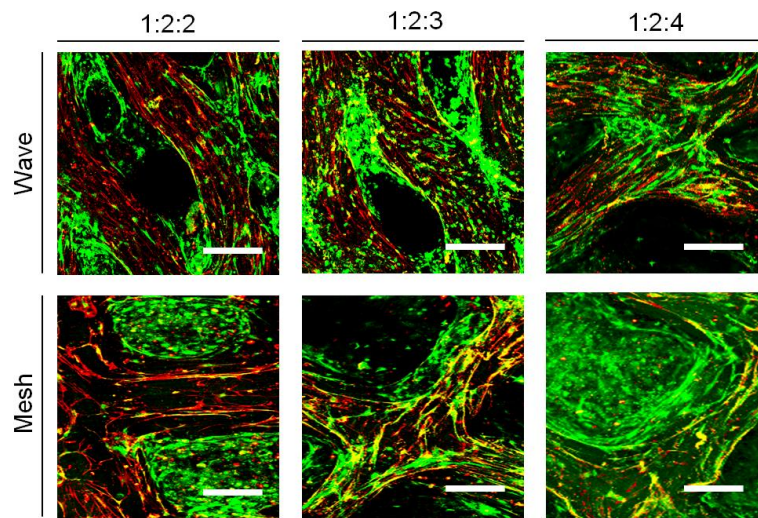

**Fig. S3. Optimization of cell ratio for tri-cultured hiPSC-CMs, hECs, and hMSCs on the hydrogel patches.** Optimization of cell ratio for tri-cultured hiPSC-CMs (green), hECs (red), and hMSCs (blue) on the hydrogel patches using cell tracker staining after 7 days of culture. The scale bar is 200  $\mu\text{m}$ .

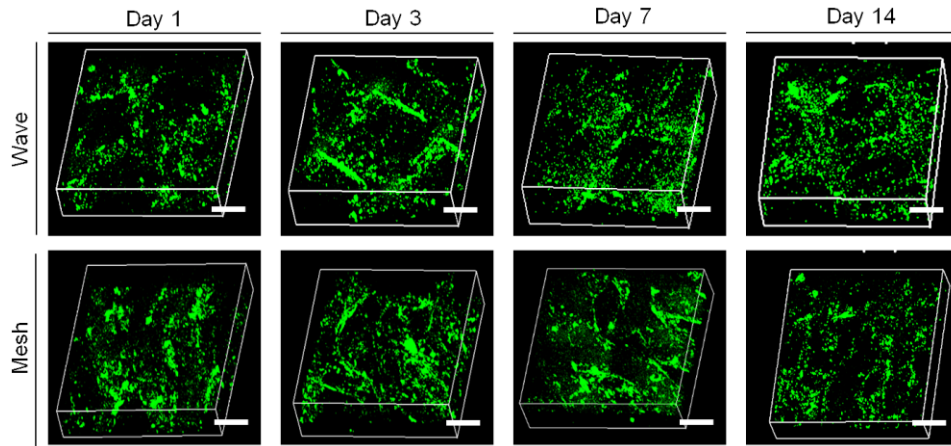

**Fig. S4. Autofluorescence 3D images of GFP+ hiPSC-CMs on the patches for 14 days.** Autofluorescence 3D images of GFP+ hiPSC-CMs on the mesh-patterned and wave-patterned patches on day 1, day 3, day 7, and day 14. The scale bar is 100  $\mu\text{m}$ .

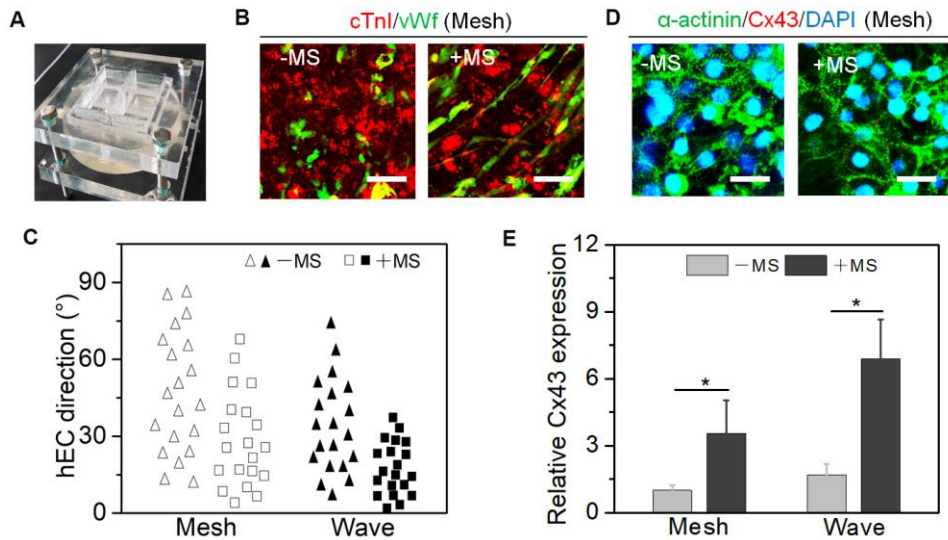

**Fig. S5. Immunostaining of hiPSC-CMs on the mesh-patterned patch, and directional distribution analysis of the hECs on the printed patches.** (A) Optical image of a custom-made bioreactor chamber to apply dual MS (mechanical loading and dynamic flow) for the maturation of engineered cardiac tissue on the hydrogel patches (Photo Credit: Haitao Cui, The George Washington University). (B) Immunostaining of contractile protein (cTnI, red) and vascular protein (vWf, green) on the mesh-patterned patch under MS condition (+MS) when compared to non-stimulated control (-MS). The scale bar is 50  $\mu\text{m}$ . (C) Directional distribution analysis of the hECs on the printed patches under MS condition (+MS) when compared to non-stimulated control (-MS) on day 14; data are presented as the mean  $\pm$  sd.,  $n \geq 6$  with 3 points for each image. (D) Immunostaining of the sarcomeric structure ( $\alpha$ -actinin, green) and gap junction (Cx43, red) on the mesh-patterned patch under MS condition (+MS) when compared to non-stimulated control (-MS). The scale bar is 20  $\mu\text{m}$ . (E) Relative Cx43 expression (fluorescence intensity) of hiPSC-CMs on the printed patches under MS condition (+MS) when compared to non-stimulated control (-MS) on day 14; data are presented as the mean  $\pm$  sd.,  $n \geq 6$ , \* $p < 0.05$ .

**Table S1. Primers of quantitative RT-PCR**

| Gene name | Protein name        | Forward primer           | Reverse primer           |
|-----------|---------------------|--------------------------|--------------------------|
| GAPDH     | GAPDH               | GGAGCGAGATCCCTCCAAA      | GGCTCCCCCTGCAAA          |
| TNNI3     | cTNI                | CCTCACTGACCCTCCAAACG     | GAGGTTCCCTAGCCGCATC      |
| ACTN2     | $\alpha$ -actinin 2 | CTTCTACCACGCTTTTGCGG     | CCATTCCAAAAGCTCACTCGC    |
| RYR2      | RYR2                | TTGGAAGTGGACTCCAAGAAA    | CGAAGACGAGATCCAGTTCC     |
| vWf       | vWf                 | CACCATTCAAGCTAAGAGGAGG   | GCCCTGGCAGTAGTGGATA      |
| MYL2      | MLC 2v              | ACATCATCACCCACGGAGAAGAGA | ATTGGAACATGGCCTCTGGATGGA |
| PLN       | Phospholamban       | ACAGCTGCCAAGGCTACCTA     | GCTTTTGACGTGCTTGTTGA     |
| MYL7      | MLC 2a              | GGAGTTCAAAGAAGCCTTCAGC   | AAAGAGCGTGAGGAAGACGG     |
| MYH6      | $\alpha$ MHC        | CTCCGTGAAGGGATAACCAGG    | TTCACAGTCACCGTCTTCCC     |
| CD31      | PECAM1              | GAGTCCTGCTGACCCTTCTG     | CACTCCTTCCACCAACACCT     |
| ATP2A2    | SERCA 2 $\alpha$    | TCACCTGTGAGAATTGACTGG    | AGAAAGAGTGTGCAGCGGAT     |
| CASQ2     | Calsequestrin 2     | GTTGCCCGGGACAATACTGA     | CTGTGACATTACCACCCCA      |

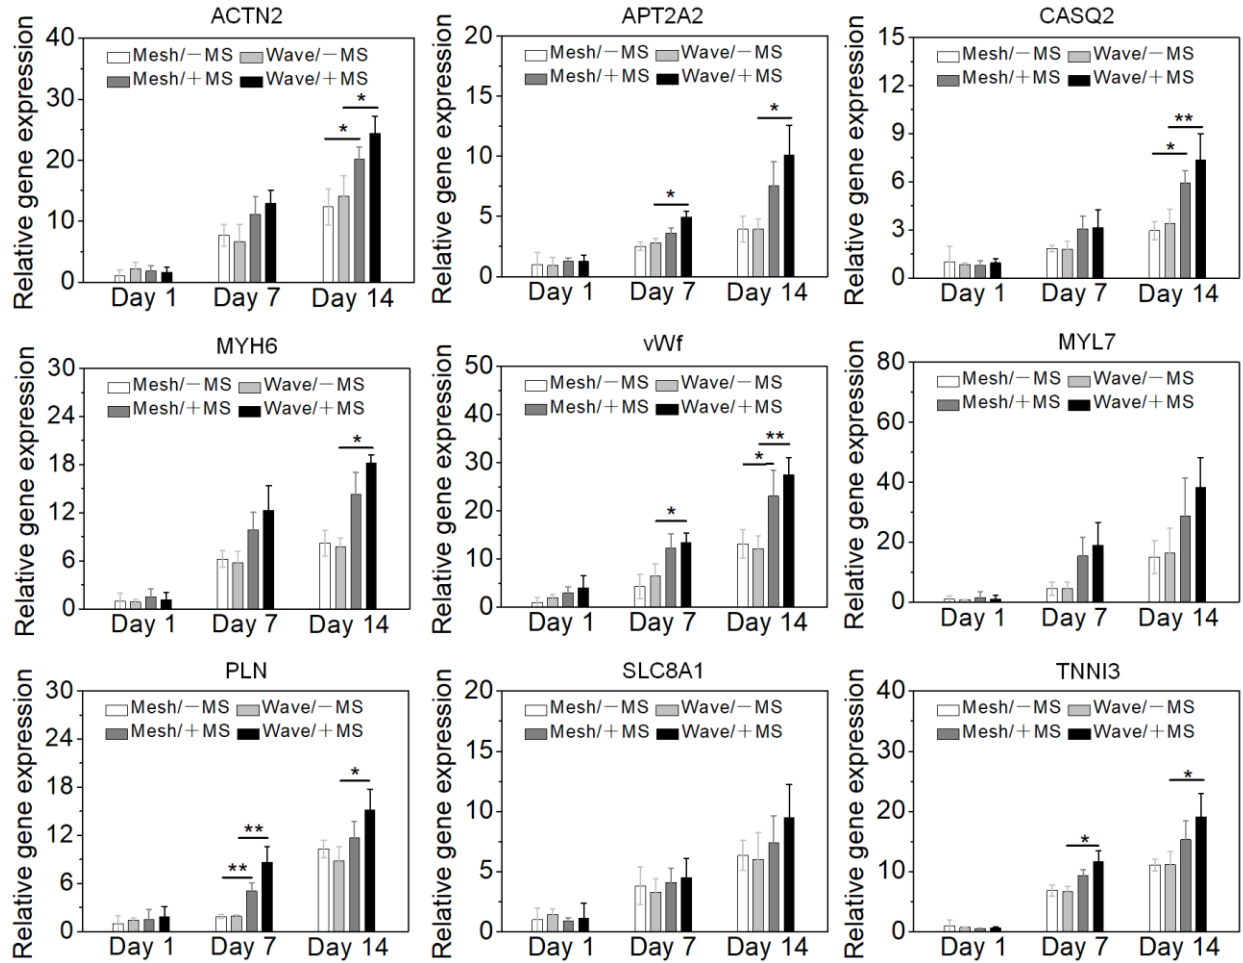

**Fig. S6. Relative gene expression of myocardial structure, excitation-contraction, and angiogenesis on the patches.** Relative gene expression of myocardial structure (ACTN2, TNNI3, MYH6, MYL7), excitation-contraction (RYR2, PLN, CASQ2, SLC8A1), and angiogenesis (vWf) on the patches under MS condition (+MS) when compared to non-stimulated control (-MS) on day 1, day 7, and day 14; data are presented as the mean  $\pm$  sd.,  $n \geq 9$ , \* $p < 0.05$ , \*\* $p < 0.01$ .



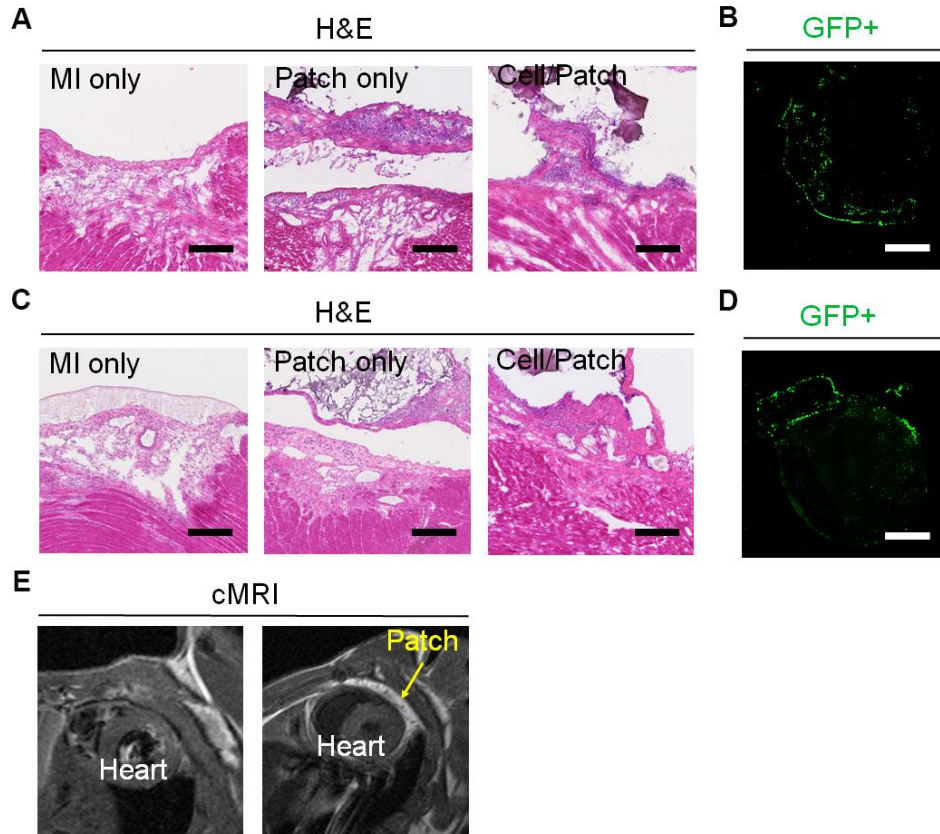

**Fig. S7. H&E staining, GFP+, and cMRI images of printed patches.** (A) Representative H&E staining images of mouse MI hearts without treatment (MI only), with the cell-free patch (Patch only), and with cellularized patch implantation (Cell/Patch) on the heart at week 10. The scale bar is 100  $\mu\text{m}$ . (B) Representative fluorescent image of implanted (GFP+) iPSC-CMs on the patch at week 10. The scale bar is 500  $\mu\text{m}$ . (C) Representative H&E staining images of mouse MI hearts without treatment (MI only), with the cell-free patch (Patch only), and with cellularized patch implantation (Cell/Patch) on the heart for 4 months. The scale bar is 100  $\mu\text{m}$ . (D) Representative fluorescent image of implanted (GFP+) iPSC-CMs on the patch for 4 months. The scale bar is 500  $\mu\text{m}$ . (E) Representative cMRI images of a mouse heart with the implanted patch. Left is MI only, and right is cellularized patch implantation into mice heart.

**Movies S1.** Spontaneous contractions of monolayer hiPSC-CMs on the well plate on day 7.

**Movies S2.** Spontaneous contractions of GFP+ hiPSC-CMs along the fiber direction of the printed patch on day 3.

**Movies S3.** Assembled hiPSC-CM fiber on the cardiac patch spontaneously contracted along with fibers after 2 weeks of MS.

**Movies S4.** Operation of patch implantation positioned over the infarcted site of the mice's heart.

**Movies S5.** cMRI video of the implanted patch on the heart area of mice showing contraction and relaxation with the heart beating at week 10.
